# Supplementary material
Source: ML conference proceedings conference paper supplement (https://www.ecva.net/papers/eccv_2020/papers_ECCV/html/123550273_ECCV_2020_paper.php)
Supplement: Supplementary file 11 [file 123550273-supp.zip]

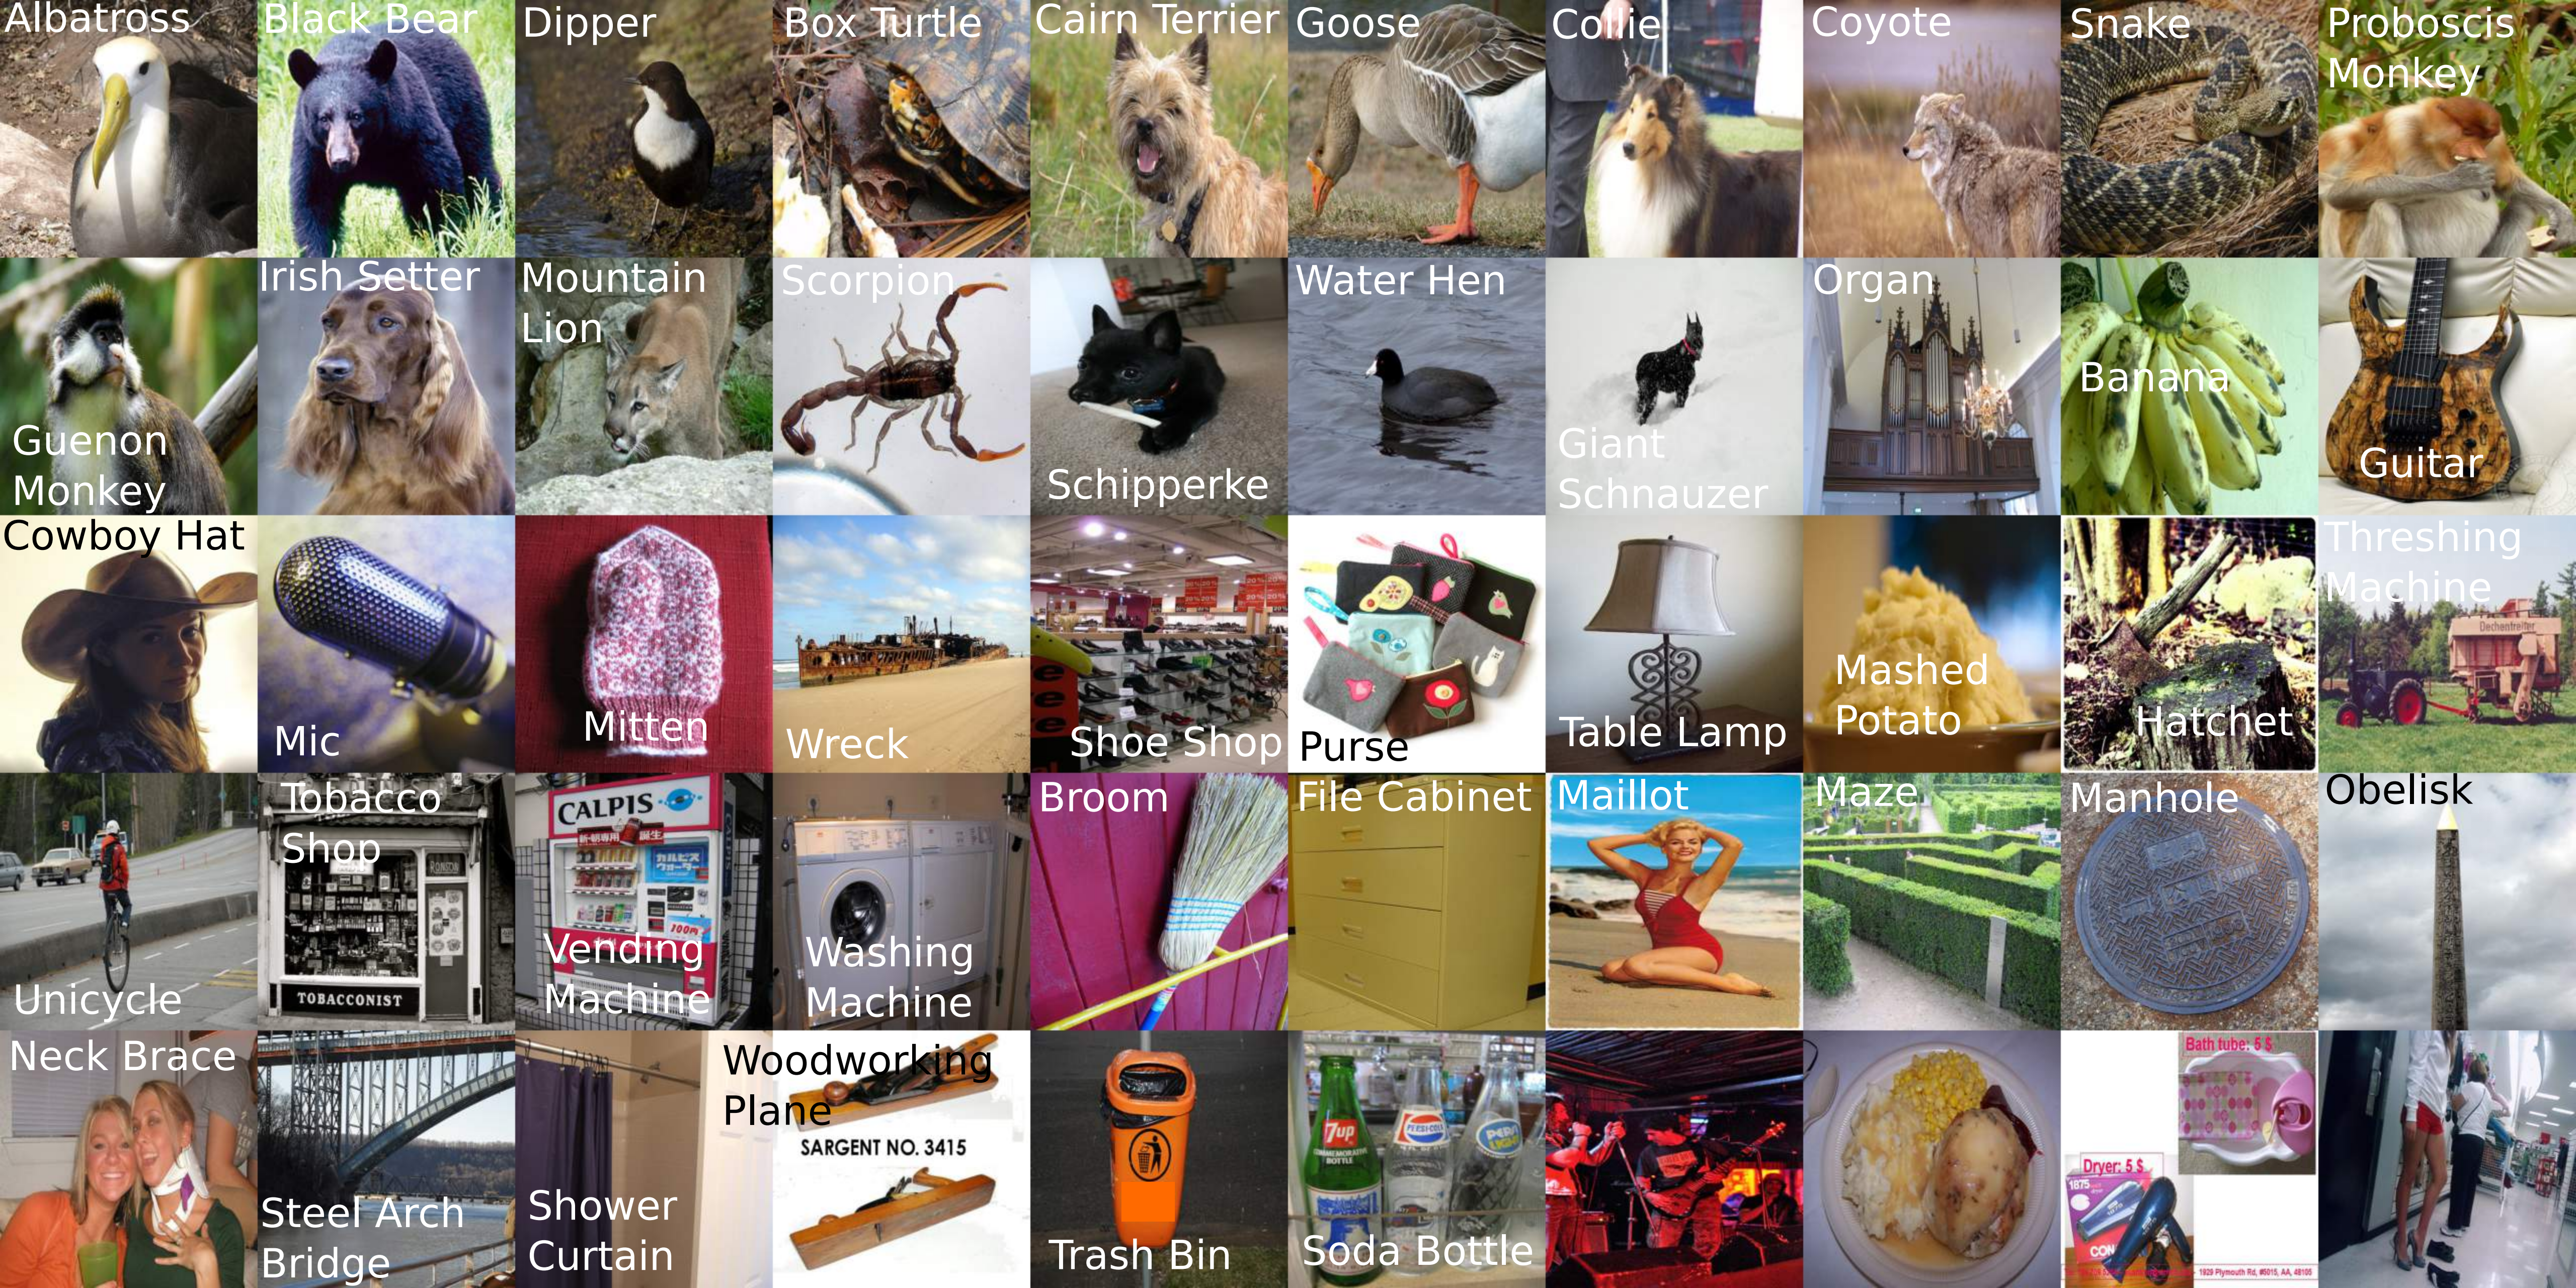

Albatross Black Bear Dipper Box Turtle Cairn Terrier Goose Collie Coyote Snake Proboscis Monkey Guenon Monkey Irish Setter Mountain Lion Scorpion Schipperke Water Hen Giant Schnauzer Organ Banana Guitar Cowboy Hat Mic Mitten Wreck Shoe Shop Purse Table Lamp Mashed Potato Hatchet Threshing Machine Unicycle Neck Brace Tobacco Shop Vending Machine Washing Machine Broom File Cabinet Maillot Maze Manhole Obelisk Steel Arch Bridge Shower Curtain Woodworking Plane Trash Bin Soda Bottle

Bath tube: 5 \$  
Dryer: 5 \$  
1875  
CON  
1929 Plymouth Rd, #5015, AA, 48105
